# Supplementary material for: Integrative single cell analysis to decode transcriptomic heterogeneity in pulmonary fibrosis across diverse pathologies
Source: Research Square preprint supplement (doi:10.21203/rs.3.rs-4897173/v1), 2024-09-08
Supplement: Supplementary file 1 [file 1cbc2ac1c7c5cabb979f5718.docx]

**Table S1. Single cell transcriptomic datasets used for the study**

| **Study** | **Disease states** | **Methods** | **Chemistry** | **Pipeline** | **GSE_ID** |
| --- | --- | --- | --- | --- | --- |
| Reyfman et al. 2019 | Control; Cryobiopsy, HP; ILD; IPF | scRNAseq | 10X_3V2 | CellRanger | GSE122960 |
| Morse et al. 2019 | Control; IPF | scRNAseq | 10X_3V1; 10X_3V2 | CellRanger | GSE128033 |
| Valenzi et al. 2019 | Control; ILD | scRNAseq | 10X_3V2 | CellRanger | GSE128169 |
| Tsukui et al. 2020 | Control; IPF; SCD | scRNAseq | 10X_3V2 | CellRanger | GSE132771 |
| Habermann et al. 2020 | Control; ILD; IPF; NSIP; Sarcoidosis; HP | scRNAseq | 10X_5 | CellRanger | GSE135893 |
| Adams et al. 2020 | Control; COPD; IPF | scRNAseq | 10X_3V2 | zUMIs | GSE136831 |
| Xu et al. 2020 | COVID | scRNAseq | 10X_3V3 | CellRanger | GSE149878 |
| Bharat et al. 2020 | Control; COVID | scRNAseq | 10X_3V3 | CellRanger | GSE158127 |
| Sun et al. 2021 | Control; ILD; IPF | scRNAseq | 10X_3V2 | CellRanger | GSE159354 |
| Melms et al. 2021 | Control; COVID | snRNAseq | 10X_3V3 | CellRanger | GSE171524 |
| Delorey et al. 2021 | COVID | snRNAseq; scRNAseq | 10X_3V3; 10X_5 | CellRanger | GSE171668 |
| Rooij et al. 2023 | Control;IPF;COVID | snRNAseq | 10X_3V3 | CellRanger | GSE159585 |
| Khatri et al. 2023 | Control; CLAD | scRNAseq | 10X_3V2 | CellRanger | GSE224210 |
| NU_snRNAseq | Control; COVID | snRNAseq | 10X_3V3 | CellRanger | Pending |
| NU_CLAD | Control; CLAD | scRNAseq | 10X_3V3 | CellRanger | Pending |
