# Supplementary material for: Integrative single cell analysis to decode transcriptomic heterogeneity in pulmonary fibrosis across diverse pathologies
Source: Research Square preprint supplement (doi:10.21203/rs.3.rs-4897173/v1), 2024-09-08
Supplement: Supplementary file 2 [file 31358e83d5c73b5c8733caed.xlsx]

## Sheet: Sheet1
Variable	Age	Gender	Race	Etiology of Lung failure	Smoking	HTN	DM	Cause of death	Covid diagnosis	Days to lung transplant	Days from first LTx to lung transplant	Days from CLAD diagnosis to lung transplant
COVID-19 dataset
COVID-19
1	63	Male	Other	COVID-19	No	No	Yes	NA	2021-01-10	314	NA	NA
2	28	Female	White	COVID-19	No	No	No	NA	2021-01-27	87	NA	NA
3	65	Male	Asian	COVID-19	Yes	Yes	No	NA	2021-02-25	300	NA	NA
Control (Donor)
1	34	Male	White	NA	No	No	No	Anoxia	NA	NA	NA	NA
2	48	Female	White	NA	No	No	No	Stroke	NA	NA	NA	NA
CLAD dataset
CLAD
CLAD1	43	F	white	BOS	0	0	0	-	0	NA	1807	320
CLAD2	18	M	hispanic/latino	RAS/mixed	0	1	0	-	0	NA	1106	465
CLAD3	55	M	white	BOS	0	0	0	-	0	NA	481	198
CLAD4	30	M	other	BOS	0	0	0	-	0	NA	854	148
Control (Donor)										NA
Contro1	33	M	Caucasian	NA	NA	NA	NA	NA	NA	NA	NA	NA
Control2	47	M	Hispanic	NA	NA	NA	NA	NA	NA	NA	NA	NA
Control3	NA	NA	NA	NA	NA	NA	NA	NA	NA	NA	NA	NA
Control4	NA	NA	NA	NA	NA	NA	NA	NA	NA	NA	NA	NA
IPF dataset
IPF2	34	female	hispanic/latino	IPF	Yes	No	No	No	NA	NA	NA	NA
IPF5	70	male	asian	IPF	Yes	Yes	Yes	Yes	NA	NA	NA	NA
IPF3	73	male	asian	IPF	No	Yes	Yes	No	NA	NA	NA	NA
